# Supplementary material for: Covalent α-Synuclein Dimers: Chemico-Physical and Aggregation Properties
Source: PubMed Central journal article supplement (PMC3521728; doi:10.1371/journal.pone.0050027), 2012-12-13
Supplement: pone.0050027.s003.pdf [file pone.0050027.s003.pdf]

**Table S3.** Analytical characterization of aS dimers fragments obtained by proteolysis with proteinase K of aggregated species, after removal of the soluble species by ultracentrifugation.

| Protein | RT <sup>a</sup> | Experimental Mass (Da) <sup>b</sup> | Calculated Mass (Da) <sup>c</sup> | Fragment <sup>d</sup> |
|---------|-----------------|-------------------------------------|-----------------------------------|-----------------------|
| aS      | 27.8            | 5663.25 ±0.07                       | 5662.62                           | 1-56                  |
|         | 28.8            | 8815.5 ±0.41                        | 8815.58                           | 57-140                |
|         |                 | 7058.85 ±0.25                       | 7059.79                           | 57-125                |
|         |                 | 11411.98 ±0.78                      | 11412.59                          | 31-140                |
|         | 30.2            | 12596.29 ±0.78                      | 12596.1                           | 19-140                |
|         |                 | 9655.9 ±0.07                        | 9656.8                            | 31-125                |
|         | 30.5            | 9655.9 ±0.07                        | 9656.8                            | 31-125                |
|         | 33.1            | 14458.8 ±0.1                        | 14460.19                          | 1-140                 |
|         | 33.6            | 12702.8 ±0.67                       | 12704.39                          | 1-125                 |
| 34.4    | 11330.01 ±0.04  | 11327.97                            | 1-113                             |                       |
| NN      | 13.3            | 3798.41 ±0.21                       | 3728.26                           | 19-56*                |
|         |                 | 3870.37 ±0.33                       | 3870.42                           | 18-56*                |
|         | 28.8            | 8816.21 ±0.19                       | 8815.58                           | 57-140*               |
|         |                 | 7059.69 ±0.15                       | 7059.79                           | 57-125*               |
|         | 30.1            | 12597.42 ±0.56                      | 12596.1                           | 19-140*               |
|         |                 | 10841.56 ±0.74                      | 10841.12                          | 19-125*               |
|         | 30.6            | 9464.32 ±0.85                       | 9464.7                            | 19-113*               |
|         |                 |                                     |                                   |                       |
| CC      | 28.2            | 10928.52 ±0.12                      | 10932.86                          | 57-142ss126-142       |
|         | 28.7            | 7059.8 ±0.04                        | 7059.79                           | 57-125*               |
|         |                 | 5683.24 ±0.09                       | 5683.37                           | 57-113*               |
|         | 28.9            | 14671.84 ±0.54                      | 14673.09                          | 19-142ss126-142       |
|         |                 | 14603.49 ±0.27                      | 14602.02                          | 20-142ss126-142       |
|         | 29.9            | 10842.19 ±0.06                      | 10841.12                          | 19-125*               |
|         |                 | 10770.97 ±0.02                      | 10770.05                          | 20-125*               |
|         |                 | 10912.83 ±0.25                      | 10912.19                          | 18-125*               |
|         | 30.5            | 9465.42±0.15                        | 9464.7                            | 19-113*               |
|         |                 | 9394.14±0.15                        | 9393.62                           | 20-113*               |
|         |                 | 9536.59 ±0.05                       | 9535.78                           | 18-113*               |
|         | 32.1            | 16555.24 ±0.35                      | 16540.38                          | 1-142ss126-142        |
|         | 32.3            | 12706.82 ±0.12                      | 12704.4                           | 1-125*                |
|         | 33.8            | 11330.69 ±0.98                      | 11327.98                          | 1-113*                |
|         | 34.8            | 29225.24 ±1.02                      | 29226.76                          | 1-142ss1-142          |
| NC      | 13.1            | 3799.22±0.15                        | 3799.26                           | 19-56*                |
|         |                 | 3728.19±0.15                        | 3728.26                           | 20-56*                |
|         |                 | 2614.58±0.16                        | 2615.03                           | 31-56*                |
|         | 27.9            | 5663.25 ±0.67                       | 5662.62                           | 1-56*                 |
|         | 28.8            | 7059.21 ±0.55                       | 7059.79                           | 57-125*               |
|         |                 | 8815.5 ±0.07                        | 8815.58                           | 57-140*               |
|         | 30.2            | 12596.24 ±0.22                      | 12596.1                           | 19-140*               |
|         |                 | 10771.33 ±0.24                      | 10770.05                          | 19-125*               |
|         | 30.5            | 10840.24 ±0.24                      | 10841.12                          | 20-125*               |
|         |                 | 12752.41 ±0.32                      | 12753.1                           | 19-141                |
|         |                 | 14615.83 ±0.33                      | 14616.37                          | 1-141                 |
|         | 33.5            | 14934.1 ±0.27                       | 14934.65                          | 1-143                 |
|         |                 | 12704.27 ±0.43                      | 12704.4                           | 1-125*                |

|                 |                |                |              |               |
|-----------------|----------------|----------------|--------------|---------------|
| DC <sup>e</sup> | 29.5           | 8818.04 ±0.10  | 8818.09      | 32-104/29-43  |
|                 |                | 7059.69 ±0.04  | 7059.79      | 57-125        |
|                 |                | 5684.30 ±0.39  | 5684.45      | 57-113        |
|                 |                | 6063.90 ±1.58  | 6062.3       | 57-104/29-41  |
|                 | 29.9           | 5744.26±0.15   | 5743.51      | 57-104/29-38  |
|                 |                | 6086.68±0.15   | 6085.91      | 53-104/29-38  |
|                 |                | 9157.64 ±0.24  | 9157.98      | 53-140        |
|                 | 30.6           | 7402.35 ±0.10  | 7402.18      | 53-125        |
|                 |                | 10280.90 ±0.76 | 10280.26     | 42-140        |
|                 | 30.9           | 10192.89 ±0.75 | 10193.19     | 43-140        |
|                 |                | 7211.06 ±0.07  | 7211.2       | 45-104/29-41  |
|                 |                | 7527.40 ±0.11  | 7527.56      | 42-104/29-41  |
|                 |                | 8437.18 ±0.21  | 8437.4       | 43-125        |
|                 |                | 8526.36 ±0.21  | 8524.48      | 42-125        |
|                 |                | 8660.06 ±0.48  | 8659.88      | 31-104/29-41  |
|                 | 32.2           | 7059.89 ±0.29  | 7059.79      | 57-125        |
|                 |                | 7048.37 ±0.59  | 7148.06      | 42-113        |
|                 |                | 8342.67 ±0.34  | 8340.56      | 31-104/29-38  |
|                 |                | 16325.85 ±0.56 | 16325.13     | 57-104/29-140 |
|                 |                | 6933.11 ±0.41  | 6932.81      | 44-113        |
|                 | 35.2           | 7470.42 ±0.16  | 7470.51      | 52-104/29-50  |
|                 |                | 14570.46 ±0.76 | 14570.53     | 43-104/29-113 |
|                 |                | 20035.01 ±0.57 | 20035.38     | 20-104/29-140 |
|                 |                | 20106.02 ±0.38 | 20106.45     | 19-104/29-140 |
|                 |                | 18922.64 ±0.58 | 18922.14     | 31-104/29-140 |
|                 |                | 17789.17 ±0.22 | 17789.81     | 42-104/29-140 |
|                 |                | 21969.71 ±0.67 | 21969.73     | 1-104/29-140  |
|                 | 20213.48 ±0.54 | 20213.94       | 1-104/29-125 |               |

<sup>a</sup> The peptides obtained from the proteolysis of aS and its dimers with proteinase K were purified by RP-HPLC and listed in order of retention times (RT).

<sup>b</sup> Experimental molecular masses determined by ESI-MS, using a Q-ToF instrument (Waters, Milford).

<sup>c</sup> Molecular masses calculated from the amino acid sequence.

<sup>d</sup> Peptides that can belong to both of the aS molecules that constitute the dimer are indicated by a star (\*). The disulphide bridge between the two molecule constituting NN and CC dimers is indicated by ss.

<sup>e</sup> As DC is constituted by the sequence 1-104 linked to 29-140 of aS, the sequence notation of its proteolytic fragments refers to the aS sequence numbering. In the case of fragments encompassing the two sequences, these were indicated with numbering of the segments deriving from both sequences separated by a slash.
