# Supplementary material for: Covalent α-Synuclein Dimers: Chemico-Physical and Aggregation Properties
Source: PubMed Central journal article supplement (PMC3521728; doi:10.1371/journal.pone.0050027), 2012-12-13

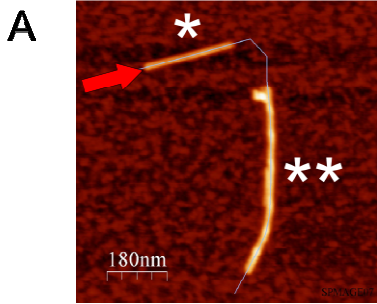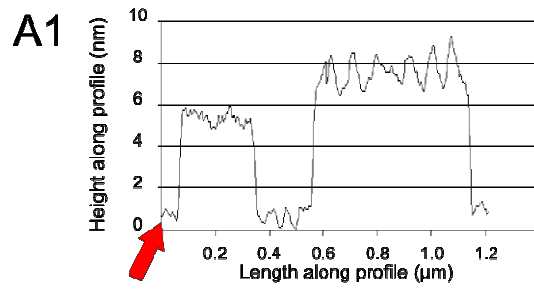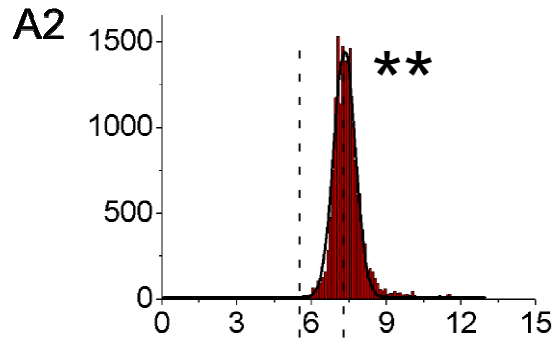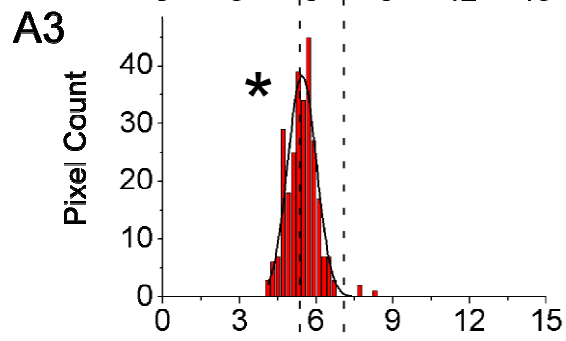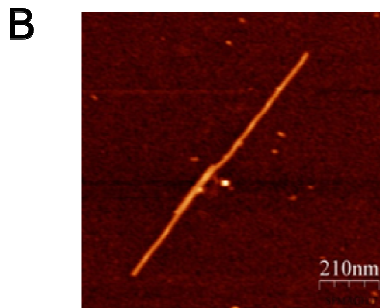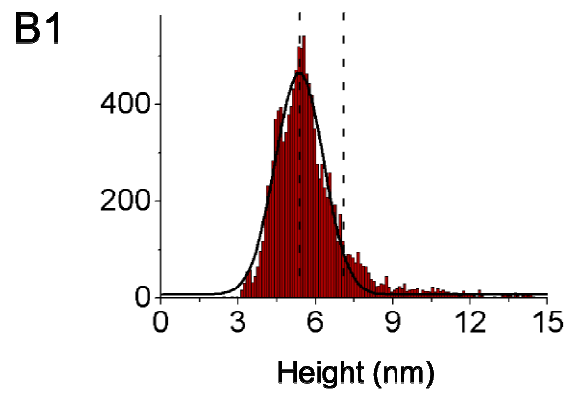

Supplement: pone.0050027.s011.pdf [file pone.0050027.s011.pdf]
