# Supplementary material for: Covalent α-Synuclein Dimers: Chemico-Physical and Aggregation Properties
Source: PLOS journal article supplement (doi:10.1371/journal.pone.0050027), 2012-12-13
Supplement: S1 (10.1371/journal.pone.0050027.s001) [file journal.pone.0050027.s001]

**Table S1.** Chemical properties of aS dimers.

|    | <i>amino<br/>acids</i> | <i>Theoretical<br/>pI</i> | <i>Experimental<br/>MW (Da)<sup>a</sup></i> | <i>Average MW<br/>(Da)<sup>b</sup></i> |
|----|------------------------|---------------------------|---------------------------------------------|----------------------------------------|
| aS | 140                    | 4.7                       | 14461.1 $\pm$ 0.7                           | 14460.1                                |
| NN | 280                    | 4.7                       | 28926.3 $\pm$ 0.5                           | 28927.2                                |
| CC | 284                    | 4.7                       | 29240.2 $\pm$ 0.3                           | 29239.6                                |
| NC | 282                    | 4.7                       | 29145.5 $\pm$ 0.1                           | 29145.5                                |
| DC | 216                    | 5.2                       | 21969.5 $\pm$ 0.1                           | 21969.7                                |

<sup>a</sup> Experimental molecular masses determined by ESI-MS.<sup>b</sup> Molecular masses calculated from the amino acid sequence of proteins.
