# Supplementary material for: Covalent α-Synuclein Dimers: Chemico-Physical and Aggregation Properties
Source: PLOS journal article supplement (doi:10.1371/journal.pone.0050027), 2012-12-13
Supplement: S2 (10.1371/journal.pone.0050027.s002) [file journal.pone.0050027.s002]

**Table S2.** Parameters gathered from the equation for the curves interpolating the dependence of the structural transition of aS dimers as a function of SDS concentration, as monitored by far-UV CD (Fig. 4).

| Protein | $x_0^a$ | $y_0^b$ | slope <sup>c</sup> |
|---------|---------|---------|--------------------|
| NN      | 0.51    | -26600  | -54400             |
| CC      | 0.54    | -22300  | -35500             |
| NC      | 0.51    | -25500  | -46300             |
| DC      | 0.46    | -18400  | -20300             |
| aS      | 0.61    | -24400  | -39100             |

<sup>a</sup> SDS concentration where 50% of protein population have acquired  $\alpha$ -helical structure

<sup>b</sup> assumed ellipticity at infinite SDS concentration

<sup>c</sup> slope of the curves shown in Fig. 4
